# Supplementary material for: Production of β-ionone by combined expression of carotenogenic and plant CCD1 genes in Saccharomyces cerevisiae
Source: PubMed Central journal article supplement (PMC4464609; doi:10.1186/s12934-015-0273-x), 2015-06-12
Supplement: 12934_2015_273_MOESM1_ESM.pdf [file 12934_2015_273_MOESM1_ESM.pdf]

## Additional file 1. Codon optimized nucleotide sequences.

Codon optimized *crtYB* nucleotide sequence

ATGACTGCCTTAGCATACTATCAAATCCACTTAATCTACACCTTGCCTATCTT  
GGGTTTATTGGGTTTATTGACATCACCTATCTTGACAAAGTTCGATATCTATA  
AGATCTCTATCTTGGTTTTATCGCTTTCTCAGCAACTACACCATGGGACTCC  
TGGATTATAAGAAATGGTGCTTGGACTTACCCTTCTGCAGAATCAGGTCAAG  
GTGTTTTTGGTACATTCTTGGATGTTCCATATGAAGAATACGCATTTTTTCGTC  
ATCCAAACTGTAATTACAGGTTTGGTCTACGTATTGGCCACCAGACATTTGT  
TACCATCATTGGCCTTACCTAAAAGTAGATCTTCAGCATTGTCCTTAGCCTTG  
AAGGCTTTGATCCCATTGCCTATCATATATTTGTTTACTGCTCATCCATCTCC  
TTCACCAGATCCTTTAGTTACCGATCACTATTTCTACATGAGAGCATTGAGTT  
TGTTAATTACCCACCTACTATGTTGTTAGCTGCATTATCTGGTGAATATGCC  
TTTGATTGAAATCAGGTCGTGCTAAGTCCACTATTGCCGCTATAATGATCC  
CAACAGTATATTTGATCTGGGTTGATTACGTTGCAGTCGGTCAAGATTCCTG  
GAGTATCAATGACGAAAAGATTGTCGGTTGGAGATTAGGTGGTGTATTGCC  
AATCGAAGAAGCTATGTTTTTCTTGTTGACAACTTAATGATTGTTTTAGGTT  
TGTCAGCCTGTGATCATACTCAAGCTTTGTATTTGTTGCACGGTAGAACAAT  
ATACGGTAATAAGAAAATGCCATCCAGTTTTCTTTGATCACTCCACCTGTTT  
TGCTTTTGTCTTTCTCTTCAAGACCATATTCCAGTCAACCTAAGAGAGATTTG  
GAATTGGCTGTAAAGTTGTTAGAAGAAAAATCAAGATCATTTTTTCGTTGCTAG  
TGCAGGTTTTCCATCTGAAGTCAGAGAAAGATTAGTAGGTTTGTACGCCTTC  
TGCAGAGTTACTGATGACTTAATTGATTCTCCAGAAGTCTCTTCAAACCCTCA  
TGCTACAATCGATATGGTTTCAGACTTTTTAACCTTGTTGTTCCGGTCCACCTT  
TGCATCCATCCCAACCTGATAAAATTTTGTCCAGTCCATTGTTACCACCTTCC  
CACCCAAGTAGACCTACAGGCATGTATCCATTACCACCTCCACCTTCCTTGA  
GTCCTGCTGAATTAGTTCAATTCTTGACTGAAAGAGTACCAGTTCAATACCA  
CTTTGCATTCAGATTGTTAGCCAAATTACAAGGTTTGTATCCCAAGATACCCTT  
TAGATGAATTGTTGAGAGGTTACACCACTGACTTAATCTTTCCATTGTCTACC  
GAAGCAGTTCAAGCCAGAAAGACTCCTATTGAAACAACCGCAGATTTGTTAG  
ACTATGGTTTATGTGTTGCTGGTTCTGTGCGAGAATTGTTAGTCTACGTATCT  
TGGGCCTCAGCTCCATCCCAAGTTCCTGCTACCATTGAAGAAAGAGAAGCC  
GTTTTGGTCGCTTCAAGAGAAATGGGTACTGCATTGCAATTGGTTAACATCG  
CCAGAGATATCAAAGGTGACGCTACAGAAGGTAGATTCTATTTGCCATTGTC  
TTTCTTTGGTTTGAAGAGATGAATCTAAGTTGGCAATTCCTACAGACTGGACC  
GAACCAAGACCTCAAGATTTTCGACAAGTTGTTATCTTTATCACCATCTTCAAC  
CTTGCCCTTCCAGTAACGCATCCGAAAGTTTTAGATTGAATGGAAGACTTAC  
TCTTTACCATTGGTCGCATACGCCGAAGATTTGGCTAAGCATTACATAAAGG  
GTATAGACAGATTGCCAACAGAAGTTCAAGCTGGTATGAGAGCAGCCTGCG  
CCTCATACTTGTGATAGGTAGAGAAATTAAGTTGTCTGGAAGGGTGACGT  
TGGTGAAAGAAGAAGTGTGCTGGTTGGAGAAGAGTAAGAAAGGTTTTGAG  
TGTTAGTTATGTCTGGTTGGGAAGGTCAATAA

Codon optimized *crtI* nucleotide sequence

ATGGGTAAAGAACAAGATCAAGACAAGCCTACTGCTATTATCGTCGGTTGC  
GGTATTGGTGGTATCGCTACTGCTGCCAGATTGGCCAAGGAAGGTTTCCAA  
GTCACTGTATTCGAAAAGAATGATTACTCCGGTGGTAGATGTAGTTTGATAG  
AAAGAGATGGTTACAGATTTGACCAAGGTCCTTCTTTGTTGTTGTTGCCAGA  
TTTGTTTAAACAACTTTTCGAAGACTTAGGTGAAAAGATGGAAGATTGGGT  
GACTTGATCAAATGTGAACCAAATATGTCTGCCATTTCCACGATGAAGAAA  
CTTTTACATTGTCTACAGACATGGCTTTGTTGAAGAGAGAAGTTGAAAGATT  
CGAGGGTAAAGATGGTTTCGACAGATTCTTATCTTTTATTCAAGAAGCTCAT  
AGACACTACGAATTGGCAGTTGTCCACGTTTTACAAAAGAATTTCCCTGGTT  
TTGCTGCATTCTTGAGATTACAATTCATCGGTCAAATATTGGCATTGCATCCA  
TTCGAATCAATTTGGACTAGAGTTTGCAGATACTTCAAGACAGATAGATTGA  
GAAGAGTATTTTCTTCGCCGTTATGTATATGGGTCAATCTCCTTACTCAGCT  
CCAGGTACCTACAGTTTGTGCAATACACCGAATTAAGTGAAGGTATTTGGT  
ACCCTAGAGGTGGTTTTTGGCAAGTACCAAACACTTTGTTGCAATCGTTAA  
GAGAAATAACCCTTCTGCCAAGTTTAATTTCAACGCTCCTGTCTCTCAAGTAT  
TGTTATCACCAGCAAAGATAGAGCCACAGGTGTTAGATTGGAATCTGGTGA  
AGAACATCACGCTGATGTAGTTATTGTCAATGCTGACTTGGTATATGCATCA  
GAACATTTGATTCCAGATGACGCCAGAAACAAAATAGGTCAATTGGGTGAAG  
TCAAGAGATCTTGGTGGGCTGATTTGGTTGGTGGTAAAAAGTTGAAGGGTT  
CATGTTCTTCATTATCCTTCTACTGGAGTATGGATAGAATCGTTGACGGTTTG  
GGTGGTCATAACATTTTCTTGGCAGAAGATTTCAAAGGTTCTTCGACACCA  
TCTTTGAAGAATTGGGTTTACCTGCCGATCCAAGTTTTTATGTTAACGTCCCA  
TCCAGAATTGATCCTAGTGCCGCTCCAGAGGGTAAAGACGCAATTGTTATAT  
TAGTCCCTTGCGGTCATATTGATGCCTCCAATCCACAAGACTACAACAAATT  
GGTTGCAAGAGCCAGAAAGTTCGTCATACACACATTATCTGCTAAGTTGGGT  
TTGCCTGATTTTCGAAAAGATGATCGTCGCAGAAAAGGTACATGATGCCCCAT  
CCTGGGAAAAGGAGTTTAATTTGAAGGATGGTAGTATTTTGGGTTTAGCTCA  
TAACTTCATGCAAGTCTTGGGTTTTAGACCTTCTACAAGACACCCAAAGTAC  
GATAAGTTATTTTTCGTTGGTGCATCAACACATCCTGGTACCGGTGTACCAA  
TAGTTTTGGCTGGTGCAAAGTTGACCGCTAACCAAGTTTTAGAATCTTTTGA  
TAGATCACCAGCACCTGACCCAAATATGTCCTTGAGTGTACCTTATGGTAAA  
CCATTAAGTCTAACGGTACTGGTATCGATTACAAGTTCAATTGAAATTCAT  
GGACTTAGAAAGATGGGTTTACTTGTAGTCTTGTTAATAGGTGCCGTTATC  
GCTAGATCAGTAGGTGTTTTGGCTTTTAA

Codon optimized *PhCCD1* nucleotide sequence

ATGGGTAGAAAAGAATCAGATGACGGTGTAGAAAAGAATAGAAGGTGGTGT  
GTCGTTGTAAATCCAAAGCCTAAGAAGGGTATCACTGCCAAAGCTATCGATT  
TGTTAGAAAAGTTATTATAAAGTTAATGCATGACTCTTCAAAGCCATTGCAC  
TATTTGTCTGGTAACTTTGCTCCTACAGATGAAACCCACCTTTGAACGACTT  
ACCAATTAAGGTCATTTGCCTGAATGTTTGAACGGTGAATTTGTCAGAGTA  
GGTCCAAATCCTAAGTTCGCTCCAGTTGCAGGTTACCATTGGTTTGATGGTG  
ACGGTATGATACAGGTTTGAGAATTAAGATGGTAAAGCCACATATGTTTT

CAGATACGTCAGAACCAGTAGATTGAAGCAAGAAGAATTTTTCGAAGGTGCA  
AAGTTTATGAAGATTGGTGACTTGAAGGGTTTGTTCGGTTTGTTCACTGTTTA  
CATGCAAATGTTGCGTGCTAAGTTGAAGATCTTGGACACATCTTATGGTAAC  
GGTACTGCCAATACAGCTTTAGTTTACCATCACGGTAAATTGTTAGCATTGT  
CAGAAGCCGATAAACCATATGCATTAAGGTTTTGGAAGATGGTGACTTACA  
AACCTTGGGCATGTTGGATTACGACAAGAGATTGTTGCATTCTTTTACAGCT  
CACCCAAAGGTTCGATCCTGTAACCGGTGAAATGTTTACTTTTCGGTTACGCAC  
ATGAACCACCTTACATCACTTACAGAGTAATTTCAAAGGATGGTATCATGCA  
AGACCCAGTTCCTATAACCATCCCTGAAGCTATTATGATGCACGATTTTCGCA  
ATCACTGAAAATTATGCCATTATGATGGACTTGCCATTGTGTTTCAGACCTAA  
GGAAATGGTTAAGAATAACCAATTAGCCTTTACTTTTCGATACTACTAAGAAAG  
CTAGATTCGGTGTCTTGCCAAGATACGCTAAATCCGAAGCATTGATCAGATG  
GTTTCGAATTGCCTAACTGTTTCATCTTCCATAATGCAAACGCCTGGGAAGAA  
GGTGACGAAGTTGTCTTGATTACATGCAGATTACCACACCCTGATTTGGACA  
TGGTAAACGGTGAAGTTAAGGAAAATTTGGAAAACCTTCTCCAACGAATTGTA  
CGAAATGAGATTCAATATGAAGTCTGGTGCTGCATCACAAAAGAAATTGAGT  
GAATCCAGTGTTGATTTCCCAAGAATCAATGAAAACACTACTGGTAGAAAAC  
AAAGATATGTCTACGGTACCACTTTGAACTCAATAGCAAAAAGTAACAGGTAT  
CATTAAAGTTCGATTTGCATGCCGAACCAGAAACCGGTAAAAAGCAATTGGAA  
GTCGGTGGTAATGTACAAGGTATTTTTGATTTGGGTCCTGGTAGATTTGGTT  
CTGAAGCTGTTTTCGTCCCATCACAACTGGTACAGAATGCCAAGAAGATG  
ACGGTTATTTGATTTTCTTTGTTTCATGATGAAAACACTGGTAAATCCGCTGTA  
AATGTTATAGACGCAAAGACAATGAGTGCCGAACCAGTTGCTGTAGTTGAAT  
TACCAAAAAGAGTCCCTTACGGTTTCCACGCCTTTTTTCGTTACAGAAGAACA  
AATACAAGAACAAGCCAAGTTATGA
