# Supplementary material for: Production of β-ionone by combined expression of carotenogenic and plant CCD1 genes in Saccharomyces cerevisiae
Source: PubMed Central journal article supplement (PMC4464609; doi:10.1186/s12934-015-0273-x), 2015-06-12

Additional file 3. Maps of plasmids construct in this study.

A. pIRP01

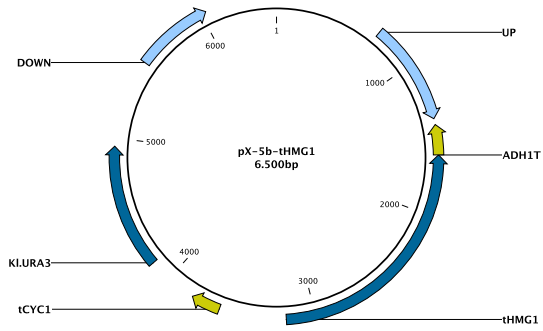

B. pIJL01

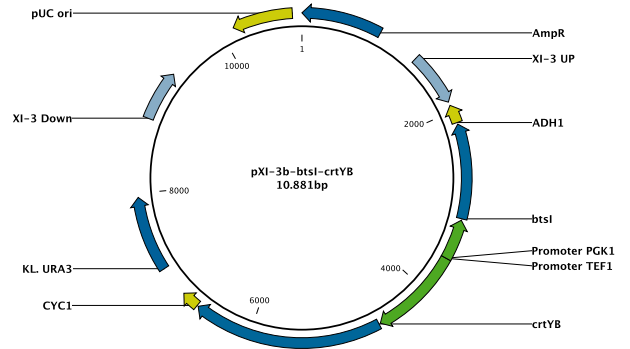

C. pIJL02

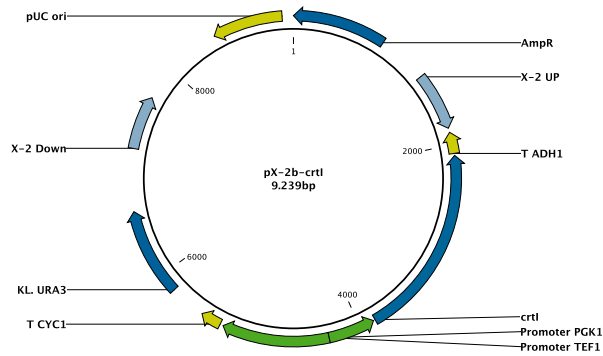

D. pIJL03

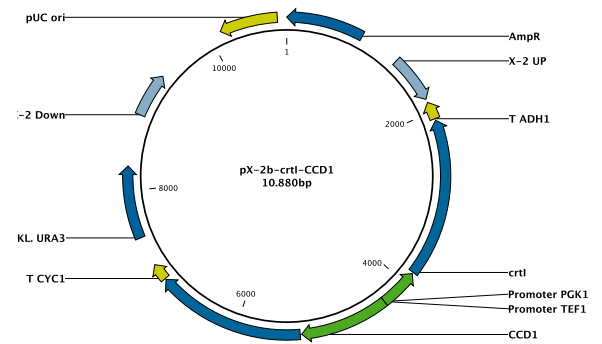

E. pEJL04

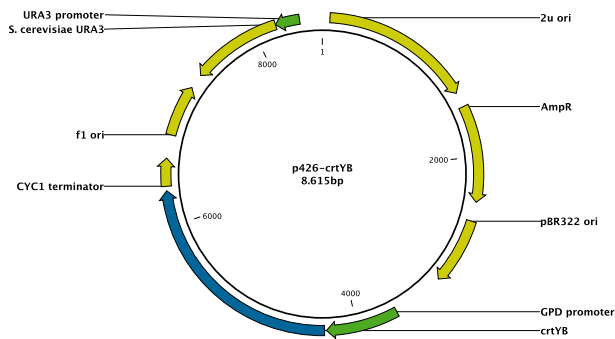

F. pEJL05

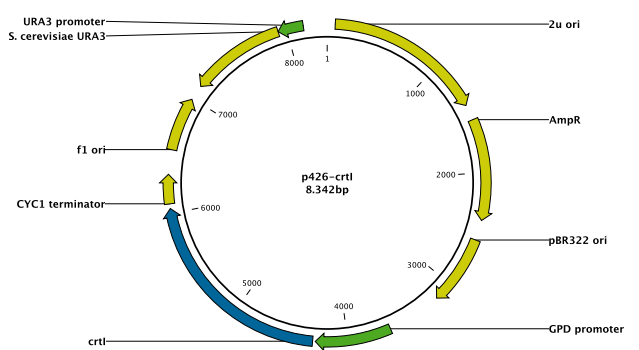

### G. pEJL06

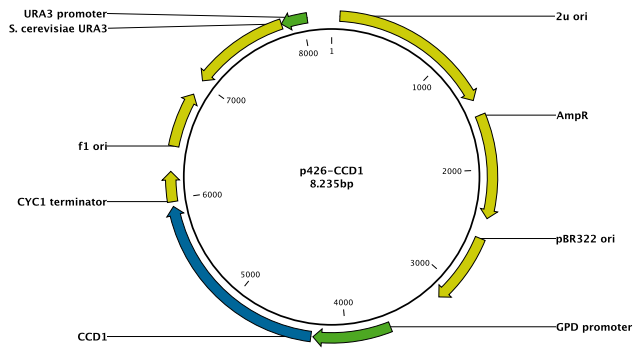

### H. pEJL07

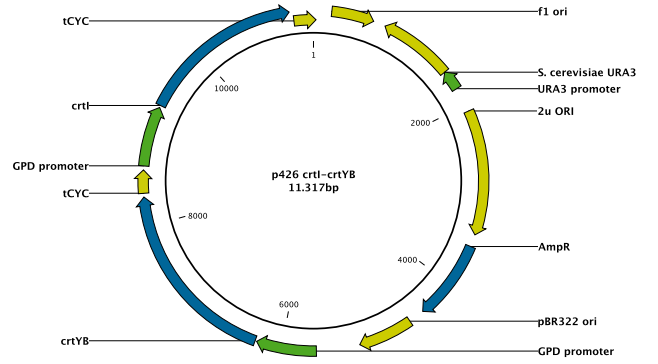

### I. pEJL08

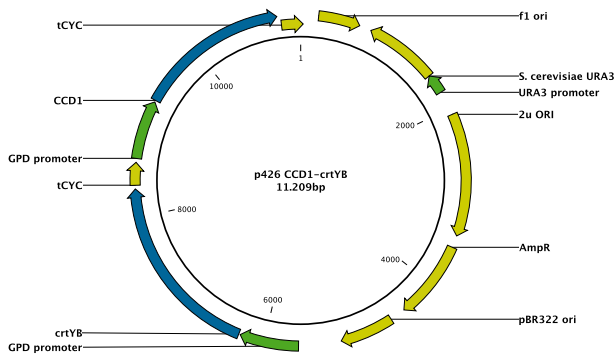

Supplement: 12934_2015_273_MOESM3_ESM.pdf [file 12934_2015_273_MOESM3_ESM.pdf]
